# Supplementary material for: Fabrication and simulation of V-shaped Ag nanorods as high-performance SERS substrates
Source: Royal Society of Chemistry journal article supplement (doi:10.1039/c8cp05533e), 2018-01-01
Supplement: c8cp05533e1.pdf [file c8cp05533e1.pdf]

## Supporting Information

### Fabrication and Simulation of V-Shape Ag Nanorods as High-Performance SERS Substrates

Jianghao Li<sup>1</sup>, Yihang Fan<sup>1</sup>, Xiaotian Xue<sup>1</sup>, Lingwei Ma<sup>3</sup>, Sumeng Zou<sup>1</sup>, Fei Zhu<sup>1</sup>,  
Zheng Xie<sup>4</sup>, Zhengjun Zhang<sup>\*1,2</sup>

1. State Key Laboratory of New Ceramics and Fine Processing, School of Material Science and Engineering, Tsinghua University, Beijing 100084, China

2. Key Laboratory of Advanced Materials (MOE), School of Materials Science and Engineering, Tsinghua University, Beijing 100084, China

3. Institute for Advanced Materials and Technology, University of Science and Technology Beijing, Beijing 100083, China

4. High-Tech Institute of Xi'an, Xi'an 710025, China

\* Corresponding Author E-mail: [zjzhang@tsinghua.edu.cn](mailto:zjzhang@tsinghua.edu.cn)

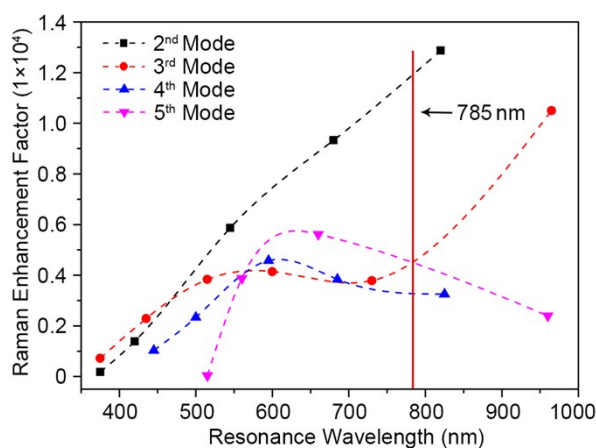

**Figure SI.** Raman EF comparisons of a straight AgNR's 2<sup>nd</sup> (black), 3<sup>rd</sup> (red), 4<sup>th</sup> (blue) and 5<sup>th</sup> (pink) modes. The 2<sup>nd</sup> mode has the strongest Raman enhancement factors at resonance wavelengths above 500 nm.
